# Supplementary material
Source: Springer Nature journal article supplement (https://www.springermedizin.de/resource/supplementary/12974_2010_227_MOESM3_ESM.pdf/9601036)

## 60min MCAO

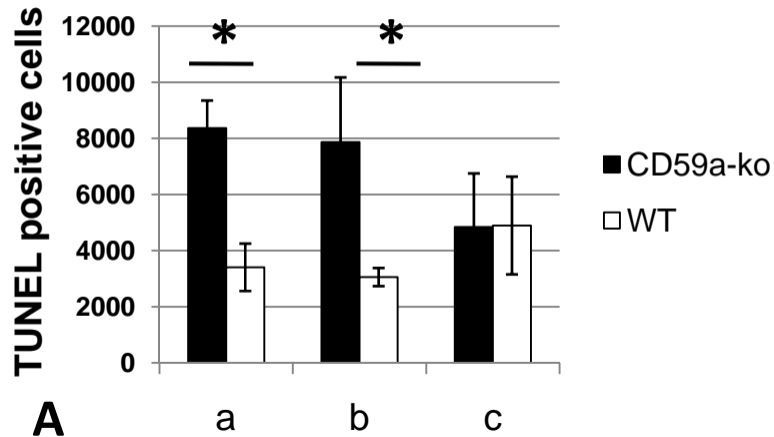

## 30min MCAO

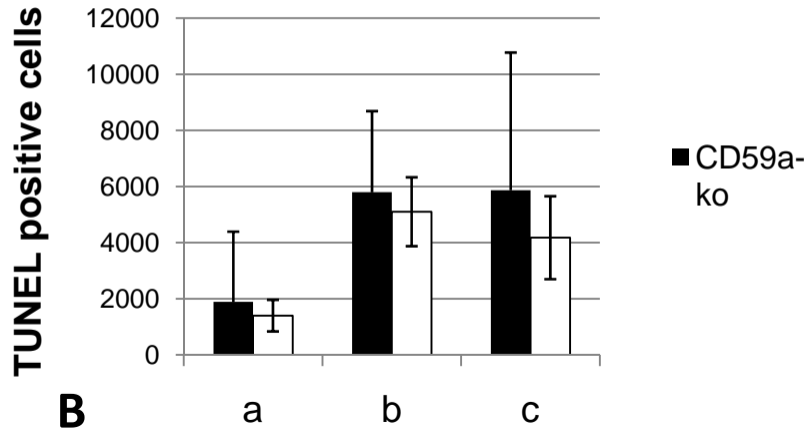

Supplement: MOESM3 [file 9601036]
